# Supplementary material
Source: Springer Nature journal article supplement (https://www.springermedizin.de/resource/supplementary/12958_2009_636_MOESM2_ESM.pdf/9568358)

***CCL2***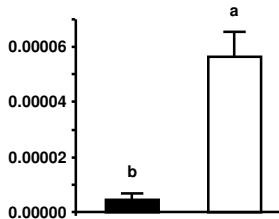***GADD45A***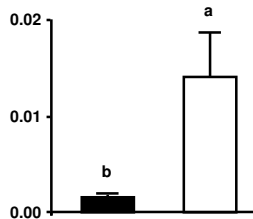***IGFBP5***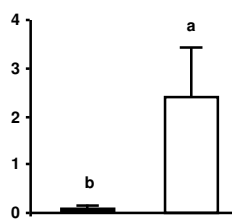***PLAUR***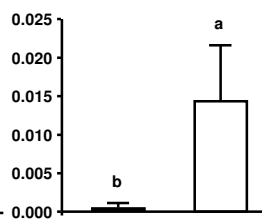***SELP***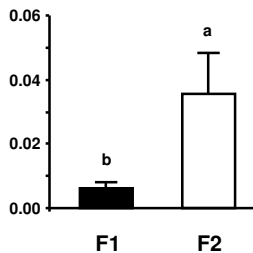***SPP1***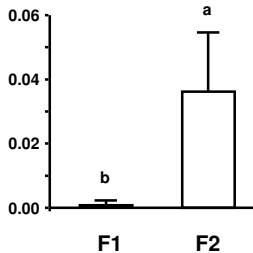***TIMP1***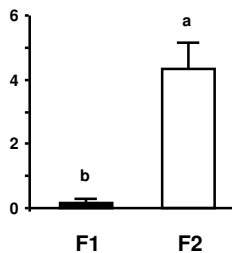***TSP2***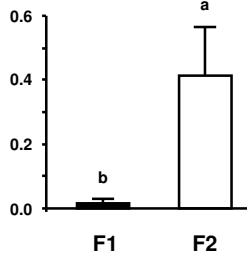

Supplement: MOESM2 [file 9568358]
